# Supplementary figures and images for: The Importance of Bottlenecks in Protein Networks: Correlation with Gene Essentiality and Expression Dynamics
Source: PLOS journal article supplement (doi:10.1371/journal.pcbi.0030059), 2007-04-17

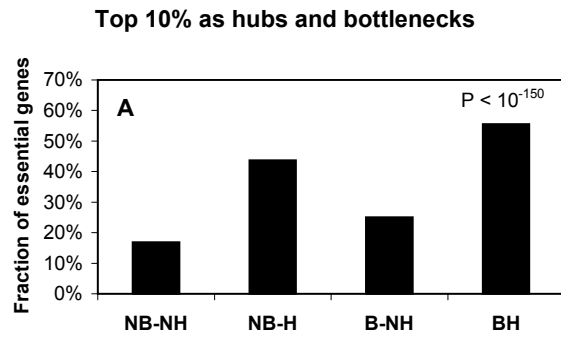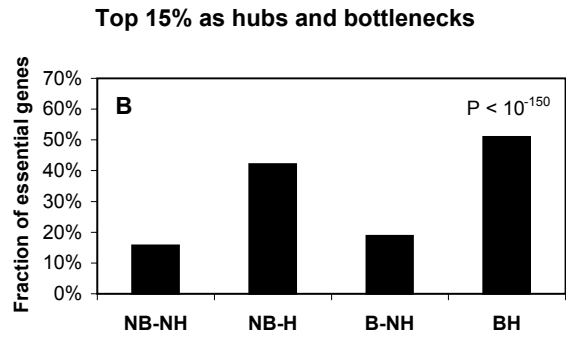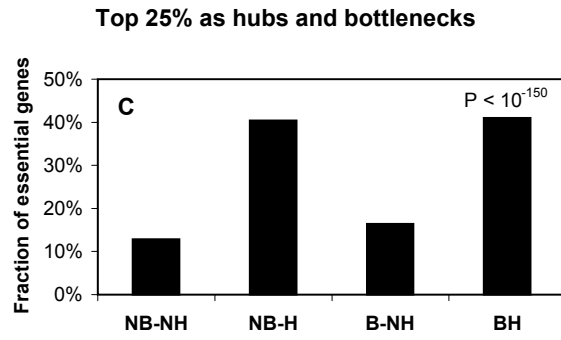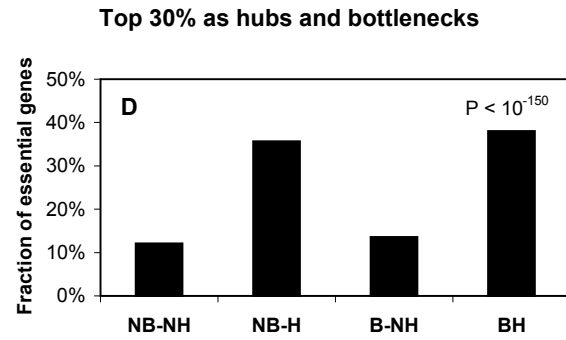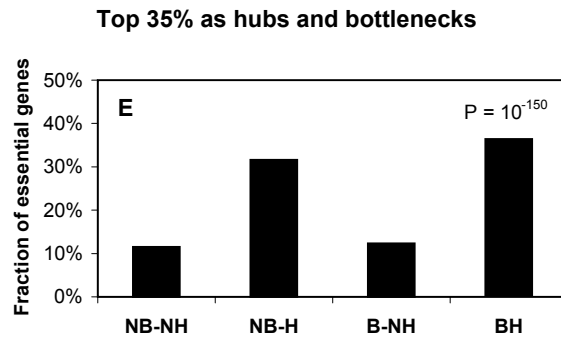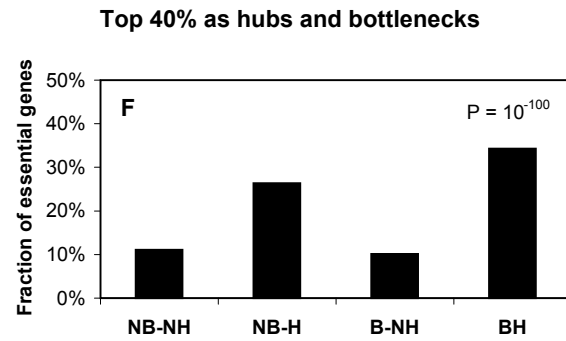

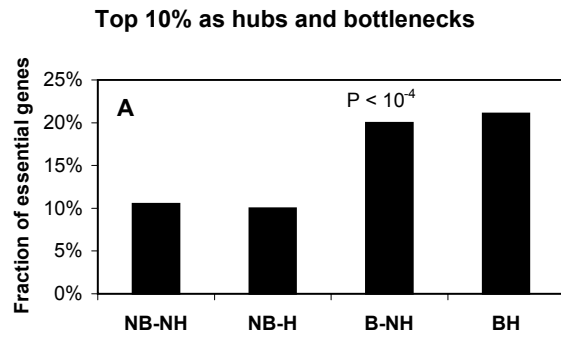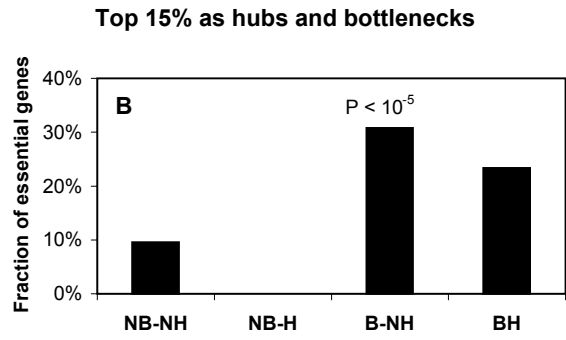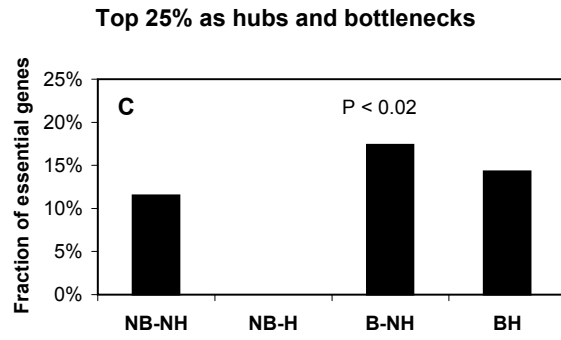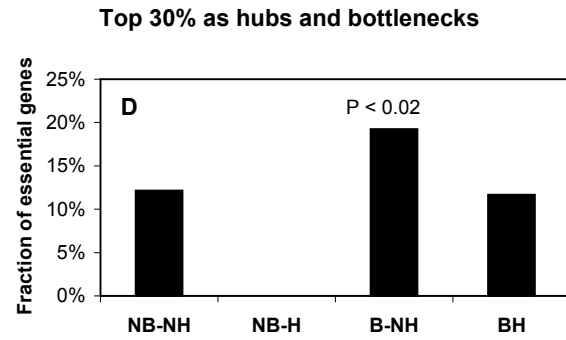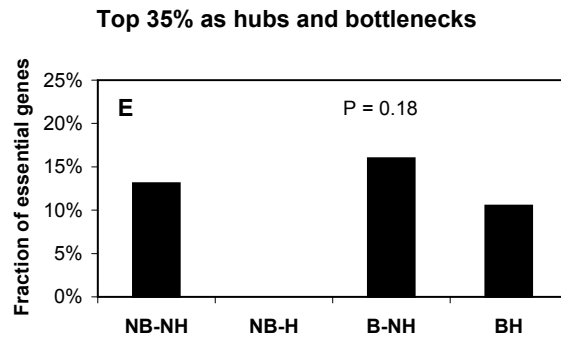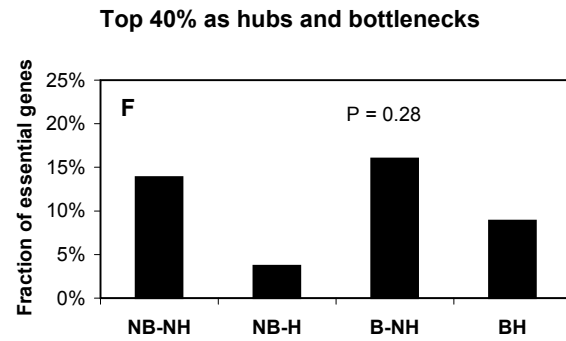

Supplement: S5 (10.1371/journal.pcbi.0030059.s005) [file journal.pcbi.0030059.s005]
